# Supplementary material for: Battling the opioid epidemic: lessons learned and management strategies
Source: PubMed Central journal article supplement — Arthroplast Today. 2018 Nov 12;5(1):2–4. doi: 10.1016/j.artd.2018.10.003 (PMC6470326; doi:10.1016/j.artd.2018.10.003), 2018-11-12
Supplement: mmc1.pdf [file mmc1.pdf]

# INDIVIDUAL CONFLICT OF INTEREST STATEMENT

## *American Association of Hip and Knee Surgeons*

(Adopted from the American Academy of Orthopaedic Surgeons disclosure statement)

The following form **must be filled out completely and submitted by each author (example, 6 authors, 6 forms).**  
**All items require a response. If there is no relevant disclosure for a given item, enter "None."**

### **Manuscript Title: Risk Stratification in Primary Total Joint Arthroplasty: The Current State of Knowledge**

1. Royalties from a company or supplier (The following conflicts were disclosed)  
*DePuy, Inc.*
2. Speakers bureau/paid presentations for a company or supplier (The following conflicts were disclosed)  
*None*
- 3A. Paid employee for a company or supplier (The following conflicts were disclosed)  
*None*
- 3B. Paid consultant for a company or supplier (The following conflicts were disclosed)  
*None*
- 3C. Unpaid consultants for a company or supplier (The following conflicts were disclosed)  
*None*
4. Stock or stock options in a company or supplier (The following conflicts were disclosed)  
*Hip Innovation Technology*
5. Research support from a company or supplier as a Principal Investigator (The following conflicts were disclosed)  
*None*
6. Other financial or material support from a company or supplier (The following conflicts were disclosed)  
*None*
7. Royalties, financial or material support from publishers (The following conflicts were disclosed)  
~~*None*~~
8. Medical/Orthopaedic publications editorial/governing board (The following conflicts were disclosed)  
*None*
9. Board member/committee appointments for a society (The following conflicts were disclosed)  
*Hip Society, Western Orthopaedic Assn.*

### **Each author must sign AND print or type his/her name, date and submit a separate form**

In addition, one BLINDED Conflict of Interest form (no author names used) should be submitted per manuscript with all author disclosures.

Jay R. Lieberman, MD

Author Name (Print or Type)

Author Signature

Date

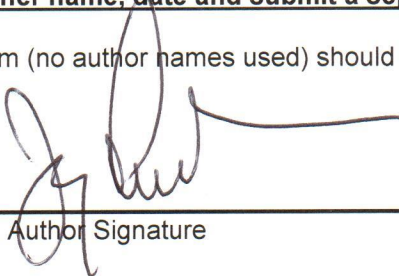

*8/7/18*
